# Supplementary material for: Bacterial community composition and function in different habitats in Antarctic Fildes region revealed by high-throughput sequencing
Source: Front Microbiol. 2025 Jun 16;16:1524681. doi: 10.3389/fmicb.2025.1524681 (PMC12206884; doi:10.3389/fmicb.2025.1524681)
Supplement: Supplementary Table S1 — Community composition in 12 samples at the phylum level based on metagenomic data. [file Table_1.xlsx]

## Sheet: Phylum
Phylum	IT1	IT2	Sed1	Sed2	Sed3	Or1	So1	So2	So3	So4	So5	So6
Acidobacteria	0.00902462	0.00831168	0.00552726	0.00391488	0.0133303	0.011269	0.0462729	0.0238039	0.0528262	0.0674518	0.0507916	0.0632897
Actinobacteria	0.321491	0.250823	0.0182613	0.0221426	0.0540352	0.358943	0.394988	0.560488	0.448502	0.39351	0.421974	0.403562
Annelida	1.75185e-05	1.85734e-05	2.73638e-05	2.70358e-05	2.44222e-05	1.28506e-05	5.11352e-06	7.64038e-06	1.88594e-06	4.29121e-06	1.38308e-06	4.26696e-06
Apicomplexa	2.59365e-05	2.77549e-05	3.79349e-05	9.84875e-05	6.73958e-05	9.48198e-06	2.96943e-05	2.76569e-05	2.49573e-05	1.40121e-05	1.97089e-05	1.38903e-05
Aquificae	0.00014576	0.000120131	0.000382913	0.000269473	0.000573921	0.00016188	0.000410607	8.11395e-05	0.000241903	0.00041975	0.00040118	0.000346532
Armatimonadetes	0.000763762	0.000434336	0.000386295	0.000343017	0.00057854	0.00127458	0.00386421	0.00104673	0.00433553	0.00455656	0.00401155	0.00386478
Arthropoda	0.000958741	6.59529e-05	0.000108912	0.000102591	0.000123285	0.000129379	9.51832e-05	0.000162342	3.42613e-05	0.000141172	6.65609e-05	6.7999e-05
Ascomycota	0.00026346	0.000263812	0.000176204	0.000128822	0.000208371	0.000282962	0.000210821	0.000208121	0.000285154	0.000287073	0.000191903	0.000280712
Bacillariophyta	0.000100409	4.08614e-05	0.00125566	0.000370213	0.00097086	1.8964e-05	0.000211448	0.000346153	5.0669e-05	0.00203692	7.52051e-05	1.45258e-05
Bacteroidetes	0.192796	0.194129	0.202732	0.341998	0.265408	0.0924532	0.0461412	0.0974036	0.0166727	0.0391089	0.0203454	0.0405002
Basidiomycota	0.000133626	0.000106674	9.33874e-05	5.37497e-05	6.70827e-05	0.000124763	8.48665e-05	0.000126856	7.99011e-05	0.000127861	0.000105979	0.000106583
Blastocladiomycota	5.08113e-06	2.52317e-06	1.15375e-05	1.44835e-06	4.9314e-06	7.79768e-06	1.6148e-06	1.64173e-06	1.19443e-06	2.18939e-06	9.5087e-07	2.08809e-06
Brachiopoda	4.06491e-05	1.34569e-05	2.19273e-05	6.43709e-06	6.5752e-06	8.48387e-06	8.88137e-06	5.99233e-05	4.33767e-06	1.56761e-05	8.38494e-06	9.16943e-06
Caldiserica	1.53192e-05	7.0789e-06	2.04172e-05	2.49437e-05	0.000241639	1.40982e-05	3.81271e-05	8.65067e-06	1.40188e-05	3.00385e-05	1.39173e-05	2.26966e-05
candidate_division_CPR1	3.00318e-05	1.44382e-05	7.00708e-06	9.25332e-06	1.65163e-05	4.61623e-06	1.552e-05	5.9355e-06	1.50247e-05	1.734e-05	1.37444e-05	1.97914e-05
candidate_division_CPR2	7.96297e-06	6.93873e-06	1.24436e-05	1.19891e-05	1.75339e-05	4.65365e-05	9.37478e-05	1.21236e-05	0.000111459	5.35963e-05	3.45771e-05	3.72224e-05
candidate_division_CPR3	5.612e-06	2.24282e-06	5.67815e-06	9.81657e-06	1.79253e-05	5.67671e-06	3.56152e-05	2.96775e-06	7.28602e-05	2.23318e-05	2.50684e-05	2.75991e-05
candidate_division_Hyd24-12	1.78977e-05	1.75921e-05	9.31458e-05	4.82782e-05	0.000929217	6.45648e-05	3.00531e-05	1.25024e-05	7.4809e-05	3.33663e-05	5.73115e-05	6.40044e-05
candidate_division_KD3-62	7.37902e-05	2.29889e-05	2.45852e-05	3.22659e-05	6.41865e-05	6.13209e-05	9.50935e-05	3.20138e-05	9.6183e-05	0.000113498	8.80851e-05	0.000114118
candidate_division_NC10	0.000417563	0.00045312	0.00031858	0.000266415	0.00057533	0.000783573	0.00178417	0.000340597	0.0021435	0.00242217	0.00212554	0.0021983
candidate_division_WOR-3	4.88395e-05	5.55799e-05	0.000240536	0.000224333	0.000734622	0.000129067	0.000138155	0.000103808	0.000126044	0.000157636	7.89222e-05	0.000136815
candidate_division_WWE3	4.58819e-05	3.59552e-05	1.99339e-05	1.55295e-05	3.85902e-05	5.24004e-05	8.57636e-05	1.16184e-05	6.4122e-05	6.11279e-05	7.30441e-05	5.90112e-05
candidate_division_Zixibacteria	0.000432958	0.000380088	0.00106133	0.000797797	0.00420844	0.000500611	0.0011657	0.000266403	0.00107555	0.00153652	0.00135222	0.00130533
Candidatus_Acetothermia	0.000280752	0.000197859	0.000124798	0.000115787	0.000880921	0.000327128	0.000823007	0.000288756	0.000929895	0.000979885	0.000780837	0.000783396
Candidatus_Adlerbacteria	5.612e-06	3.29414e-06	2.77867e-06	2.09206e-06	8.45383e-06	8.98293e-06	3.24753e-05	2.14688e-06	5.65782e-06	1.11221e-05	7.77984e-06	1.80665e-05
Candidatus_Amesbacteria	1.69118e-05	1.38074e-05	1.54035e-05	1.94722e-05	2.26218e-05	2.84459e-05	7.69719e-05	1.60385e-05	0.000137485	6.18285e-05	7.90086e-05	9.71414e-05
Candidatus_Aminicenantes	5.30865e-07	2.10264e-07	2.83907e-06	7.16127e-06	3.99209e-06	4.80337e-06	2.03644e-05	1.19973e-06	5.46923e-06	1.11221e-05	1.288e-05	2.3786e-05
Candidatus_Atribacteria	1.97178e-06	1.47185e-06	3.95054e-05	4.36918e-05	0.00112397	4.17956e-06	1.88393e-05	2.71518e-06	9.05252e-06	7.44394e-06	7.95273e-06	5.53797e-06
Candidatus_Azambacteria	1.26649e-05	1.30364e-05	6.76545e-06	7.24173e-06	2.33263e-05	1.47844e-05	5.01484e-05	7.76666e-06	6.73281e-05	3.03012e-05	3.95907e-05	4.94786e-05
Candidatus_Bathyarchaeota	0.000157288	0.000176202	0.000321057	0.000461781	0.00122628	0.000211411	0.000367815	8.73908e-05	0.000412141	0.000373861	0.000365393	0.000355701
Candidatus_Beckwithbacteria	1.02381e-05	1.47886e-05	6.94667e-06	1.51272e-05	1.03325e-05	7.98482e-06	5.84018e-05	1.22499e-05	0.000171432	3.07391e-05	5.83488e-05	6.5457e-05
Candidatus_Berkelbacteria	8.87302e-06	1.12141e-05	1.22624e-05	1.34374e-05	2.58312e-05	1.50339e-05	9.79643e-05	7.64038e-06	0.000154081	6.85718e-05	5.43724e-05	5.92835e-05
Candidatus_Campbellbacteria	9.85891e-07	6.09767e-06	2.89948e-06	4.10365e-06	2.34829e-06	7.7353e-06	6.54889e-06	2.33631e-06	5.65782e-07	2.71485e-06	2.4204e-06	4.44853e-06
Candidatus_Collierbacteria	5.15697e-06	4.20529e-06	4.47003e-06	8.851e-06	1.20545e-05	2.91321e-05	5.30191e-05	9.21897e-06	4.59541e-05	1.90915e-05	2.88719e-05	2.56018e-05
Candidatus_Curtissbacteria	2.18413e-05	1.2756e-05	1.28664e-05	1.43225e-05	3.23281e-05	2.88826e-05	7.12304e-05	1.45862e-05	6.19217e-05	8.51236e-05	4.94452e-05	5.90112e-05
Candidatus_Dadabacteria	0.000155164	0.000149218	0.000566184	0.00073584	0.000548325	0.000231248	0.000470444	8.67593e-05	0.000544723	0.000730644	0.000509061	0.000608178
Candidatus_Daviesbacteria	1.29683e-05	1.59801e-05	4.84455e-05	2.26908e-05	5.15058e-05	6.00109e-05	0.000193865	4.07276e-05	0.0001422	0.00013329	0.000114537	0.000117568
Candidatus_Falkowbacteria	8.79718e-06	9.53199e-06	2.88136e-05	3.00934e-05	8.38338e-05	2.05859e-05	2.33248e-05	9.53469e-06	1.22586e-05	1.92667e-05	1.85852e-05	2.14256e-05
Candidatus_Giovannonibacteria	1.37266e-05	1.01628e-05	1.4739e-05	1.30351e-05	1.90994e-05	3.13779e-05	6.56683e-05	1.38285e-05	6.85225e-05	6.4806e-05	5.77437e-05	6.02822e-05
Candidatus_Gottesmanbacteria	7.05291e-05	9.06941e-05	7.25474e-05	6.47733e-05	0.000178548	0.000129192	0.000293265	9.08637e-05	0.00021594	0.000281293	0.000229332	0.000276263
Candidatus_Jorgensenbacteria	8.11464e-06	9.04137e-06	1.99339e-06	1.93113e-06	1.00976e-05	1.84025e-05	3.13988e-05	1.34496e-05	4.53255e-05	1.56761e-05	1.91903e-05	3.09582e-05
Candidatus_Kaiserbacteria	3.1776e-05	1.52792e-05	7.97357e-06	1.3196e-05	1.56552e-05	6.25062e-05	3.69609e-05	1.81222e-05	4.8343e-05	6.92724e-05	4.99639e-05	5.72862e-05
Candidatus_Korarchaeota	9.0247e-06	3.08388e-06	6.2218e-06	9.81657e-06	1.10369e-05	2.93193e-06	2.49396e-05	4.73577e-06	1.60305e-05	1.62015e-05	1.86716e-05	1.40719e-05
Candidatus_Kuenenbacteria	9.10053e-07	1.05132e-06	3.62435e-07	1.12649e-06	1.3307e-06	3.93003e-06	2.60161e-06	8.84011e-07	1.88594e-06	9.3706e-06	1.46953e-06	4.08539e-06
Candidatus_Levybacteria	6.06702e-06	3.36423e-06	1.29873e-05	1.15063e-05	1.7299e-05	8.30297e-05	0.000177358	3.26452e-05	3.99191e-05	4.43133e-05	4.35671e-05	7.64421e-05
Candidatus_Lokiarchaeota	2.07037e-05	5.95749e-06	9.67097e-05	0.000131156	0.000198665	5.80147e-06	1.45332e-05	7.82981e-06	1.28244e-05	1.78654e-05	8.2985e-06	1.43442e-05
Candidatus_Magasanikbacteria	5.58166e-05	2.89464e-05	4.39755e-05	3.52431e-05	9.45577e-05	4.97804e-05	0.000111959	2.10268e-05	6.3179e-05	7.49648e-05	7.52916e-05	6.06453e-05
Candidatus_Marinimicrobia	2.44198e-05	2.53719e-05	0.000231717	0.000226827	0.00156349	8.90183e-05	4.43172e-05	1.07344e-05	6.6008e-05	4.81666e-05	6.64744e-05	3.97644e-05
Candidatus_Micrarchaeota	3.03351e-07	1.40176e-07	2.41623e-07	6.43709e-07	3.91381e-07	4.92813e-06	7.17687e-07	6.31436e-08	2.45172e-06	1.66394e-06	3.45771e-06	7.08134e-06
Candidatus_Microgenomates	8.72135e-06	8.76102e-06	9.66493e-06	7.0808e-06	2.61443e-05	6.14457e-05	3.56152e-05	9.72412e-06	2.12483e-05	3.0126e-05	2.53277e-05	1.95191e-05
Candidatus_Moranbacteria	9.5859e-05	5.92946e-05	5.40632e-05	9.25332e-05	0.000129547	4.43532e-05	0.000115009	1.9764e-05	0.000114037	5.69242e-05	8.6702e-05	7.68961e-05
Candidatus_Nanohaloarchaeota	1.97178e-06	1.54194e-06	1.14771e-06	2.89669e-06	7.04486e-06	0	1.88393e-06	3.15718e-07	1.88594e-06	3.76576e-06	3.63059e-06	2.36045e-06
Candidatus_Nomurabacteria	4.13316e-05	1.98349e-05	5.81104e-05	3.94272e-05	7.72586e-05	0.000121893	5.78635e-05	2.75938e-05	6.82711e-05	6.55066e-05	4.40858e-05	4.13078e-05
Candidatus_Omnitrophica	0.000185651	0.000158119	0.00045848	0.000555441	0.001099	0.000314028	0.000316141	9.50311e-05	0.000362918	0.00040171	0.000396685	0.000398643
Candidatus_Pacebacteria	6.2187e-06	2.45309e-06	3.1411e-06	5.55199e-06	7.35796e-06	3.6805e-06	8.79166e-06	1.10501e-05	1.15671e-05	7.09363e-06	1.5041e-05	2.31505e-05
Candidatus_Parcubacteria	8.58484e-05	4.97626e-05	8.96423e-05	7.47508e-05	0.00037964	0.000481397	0.000116534	3.40344e-05	8.32958e-05	0.000116914	0.000101484	0.000104858
Candidatus_Parvarchaeota	9.85891e-07	9.11146e-07	3.02029e-07	8.851e-07	2.34829e-07	2.74478e-06	2.60161e-06	1.38916e-06	2.07454e-06	1.48879e-06	2.4204e-06	3.17752e-06
Candidatus_Peregrinibacteria	4.26208e-05	5.78928e-05	0.000107341	0.00010581	0.000121563	4.84704e-05	0.000123173	5.09569e-05	7.72607e-05	0.000110521	8.86902e-05	0.000103769
Candidatus_Poribacteria	1.82011e-06	2.73344e-06	3.02029e-07	6.43709e-07	7.04486e-07	0	2.69133e-07	1.26287e-07	3.77188e-07	9.63333e-07	1.29664e-06	1.63416e-06
Candidatus_Roizmanbacteria	2.22963e-05	1.14244e-05	1.92091e-05	2.73577e-05	4.51654e-05	0.00028421	6.10931e-05	1.2755e-05	6.6448e-05	3.89712e-05	3.10329e-05	6.14624e-05
Candidatus_Rokubacteria	0.000248445	0.000176762	0.000151921	0.000109109	0.000394512	0.000398555	0.00169311	0.000275054	0.0018855	0.00224781	0.00189067	0.0018613
Candidatus_Saccharibacteria	0.000102988	3.182e-05	5.94998e-05	5.9865e-05	7.00572e-05	0.000308975	0.000507046	8.62542e-05	0.000103601	0.000136093	0.000126725	0.000184206
Candidatus_Shapirobacteria	2.12346e-06	1.7522e-06	1.32893e-06	1.12649e-06	8.29728e-06	2.22702e-05	2.59264e-05	5.05149e-06	7.16658e-06	2.41709e-05	1.00274e-05	1.37995e-05
Candidatus_Tectomicrobia	0.00285999	0.00314493	0.00113581	0.00105955	0.0014824	0.000692746	0.00160484	0.000690286	0.00144319	0.00238381	0.00175565	0.00202989
Candidatus_Thorarchaeota	6.60547e-05	6.58829e-05	9.74346e-05	8.54524e-05	0.000570321	4.21698e-05	9.81437e-05	3.15718e-05	0.000100458	9.40563e-05	0.000113153	8.12538e-05
Candidatus_Uhrbacteria	3.79947e-05	2.96473e-05	0.000135128	0.000153122	0.000198195	8.35911e-05	0.000125954	1.64805e-05	0.000139497	8.42478e-05	0.000123872	0.000126284
Candidatus_Woesebacteria	6.03669e-05	3.74972e-05	4.66333e-05	4.17606e-05	7.09183e-05	0.000104926	0.000232082	3.61181e-05	0.00037109	0.000275776	0.000205906	0.00024594
Candidatus_Wolfebacteria	3.64021e-06	1.96247e-05	1.2806e-05	1.08626e-05	1.54204e-05	1.35368e-05	1.48023e-05	5.68292e-06	1.11899e-05	1.43624e-05	1.27935e-05	1.7431e-05
Candidatus_Yanofskybacteria	1.91111e-05	1.69613e-05	1.16583e-05	8.77054e-06	2.27001e-05	2.34554e-05	5.30191e-05	1.0545e-05	6.03501e-05	4.71157e-05	4.01094e-05	4.2488e-05
Chlamydiae	0.000145609	0.000186434	0.000200729	0.000309624	0.000211894	0.000762176	0.000178973	0.000102419	0.000171558	0.000257823	0.000174787	0.000228237
Chlorobi	0.000820034	0.000784847	0.00190725	0.00167236	0.00286968	0.00206414	0.000965379	0.000634846	0.000765126	0.0011708	0.00100325	0.001548
Chloroflexi	0.0162363	0.00936041	0.00850605	0.00851515	0.0339457	0.0458872	0.0832107	0.0180149	0.16474	0.0752227	0.103644	0.103101
Chlorophyta	0.000132564	0.000113403	5.54526e-05	4.14388e-05	7.2249e-05	0.000196938	0.000160403	0.00185933	0.000133085	0.000353105	0.000121711	0.000119293
Chordata	0.000404898	0.000212157	0.000136336	0.000122868	0.00017299	0.000191823	0.000107115	0.0001177	9.85719e-05	0.000185485	0.000949659	0.000182117
Chromerida	2.28272e-05	1.80127e-05	6.2218e-06	5.06921e-06	1.17414e-05	3.05669e-06	1.39052e-05	5.63872e-05	4.90345e-06	1.58512e-05	1.22749e-05	7.80763e-06
Chrysiogenetes	6.00635e-05	8.00407e-05	0.000183392	0.000242518	0.000173851	2.49526e-05	4.24332e-05	1.66068e-05	2.55859e-05	2.85497e-05	3.18109e-05	3.77671e-05
Chytridiomycota	5.49824e-05	5.44585e-05	1.18395e-05	9.01193e-06	1.71425e-05	2.59507e-05	2.09923e-05	6.39013e-05	1.66592e-05	3.10018e-05	1.62512e-05	1.66139e-05
Cloacimonetes	4.91429e-05	4.70291e-05	0.000436009	0.00059181	0.0066898	6.55629e-05	5.34677e-05	2.55732e-05	3.03637e-05	5.12318e-05	2.89583e-05	2.85977e-05
Cnidaria	0.000290914	0.000104992	0.000208521	0.000170985	0.000182618	4.94061e-05	2.53882e-05	2.34263e-05	2.33857e-05	8.78384e-05	3.64788e-05	3.4408e-05
Crenarchaeota	7.33351e-05	4.9272e-05	6.12515e-05	6.0911e-05	0.000149273	7.69787e-05	0.000218715	5.18409e-05	0.000279811	0.000345661	0.000225615	0.000162598
Cryptomycota	9.10053e-07	4.20529e-07	1.0269e-06	5.63246e-07	7.67107e-06	6.23814e-07	2.69133e-07	3.78862e-07	1.25729e-07	7.00606e-07	2.59328e-07	0
Cyanobacteria	0.0111403	0.0125049	0.00950123	0.00742953	0.0100672	0.00958042	0.0106065	0.00718934	0.0105682	0.0155008	0.0107141	0.0144376
Deferribacteres	7.83404e-05	7.29618e-05	0.000386597	0.000843903	0.000619791	0.000106672	6.78214e-05	2.94249e-05	8.15355e-05	8.31969e-05	6.98457e-05	7.41725e-05
Deinococcus-Thermus	0.00319914	0.00234024	0.000801404	0.000690298	0.00146987	0.00233026	0.00662246	0.0244897	0.00548734	0.00559539	0.00503987	0.00516665
Dictyoglomi	6.52963e-05	2.56523e-05	3.38273e-05	5.23014e-05	0.000146377	4.22322e-05	9.31199e-05	2.08374e-05	7.55634e-05	0.000156585	8.73936e-05	7.63514e-05
Echinodermata	4.73228e-05	8.76102e-06	2.28938e-05	1.64951e-05	1.25242e-05	2.86955e-06	3.94728e-06	3.59919e-06	2.01167e-06	5.16697e-06	4.06281e-06	4.17617e-06
Elusimicrobia	1.20582e-05	7.35926e-06	2.6941e-05	3.97491e-05	4.97054e-05	7.79768e-06	3.104e-05	3.28347e-06	2.00538e-05	1.72524e-05	1.54732e-05	1.89744e-05
Entomophthoromycota	2.35097e-06	7.00882e-07	2.23502e-06	7.24173e-07	2.34829e-06	9.35721e-07	1.16624e-06	2.14688e-06	1.13156e-06	7.70666e-06	3.45771e-06	1.90651e-06
Euglenida	4.55027e-07	8.41058e-07	1.81218e-07	8.04637e-08	5.47934e-07	0	8.97109e-08	6.31436e-08	0	0	0	9.07864e-08
Euryarchaeota	0.003123	0.00244636	0.00296321	0.00475098	0.00727358	0.00238347	0.00366182	0.00135393	0.00463049	0.00449728	0.00405088	0.00450074
Eustigmatophyceae	8.64551e-06	2.10264e-06	1.42558e-05	1.74606e-05	1.75339e-05	1.82778e-05	1.68656e-05	1.2755e-05	1.45846e-05	1.18227e-05	5.53233e-06	4.81168e-06
Fibrobacteres	5.21006e-05	7.91996e-05	0.000207373	0.000296187	0.000406254	6.53757e-05	4.45863e-05	1.98271e-05	7.82037e-05	5.12318e-05	6.02506e-05	6.10085e-05
Firmicutes	0.0105726	0.00811887	0.0211154	0.0439723	0.0560118	0.0128139	0.0279955	0.00791606	0.0315348	0.0292597	0.0256151	0.0260162
Fusobacteria	0.000147808	7.94099e-05	0.00383052	0.040557	0.00391921	0.000108419	7.75102e-05	2.6836e-05	5.59496e-05	8.43354e-05	7.99595e-05	6.83622e-05
Gemmatimonadetes	0.00704943	0.00638748	0.0054837	0.00373231	0.00858283	0.0419484	0.0436246	0.0137799	0.0398506	0.0317133	0.0468956	0.0348496
Glomeromycota	1.31958e-05	1.1915e-05	2.01756e-05	2.45414e-05	1.33852e-05	2.40792e-05	2.5119e-06	1.02924e-05	2.32599e-06	6.56818e-06	3.37126e-06	3.44988e-06
Hemichordata	2.63157e-05	1.21953e-05	1.8907e-05	5.87385e-06	6.73175e-06	8.79578e-06	7.71513e-06	2.75938e-05	2.45172e-06	8.40727e-06	5.53233e-06	4.08539e-06
Ignavibacteriae	0.000262854	0.000229819	0.00733593	0.00387851	0.0121169	0.00167176	0.000247781	0.000159627	0.000348836	0.00028322	0.000297449	0.000354612
Latescibacteria	0.000207644	0.000223791	0.000402665	0.000275427	0.0016939	0.000128693	0.00038172	7.92452e-05	0.000347453	0.000404425	0.000663361	0.000590656
Lentisphaerae	0.000325647	0.000233884	0.000661202	0.00143418	0.000596543	4.07975e-05	3.3193e-05	2.6394e-05	4.14907e-05	4.624e-05	5.35945e-05	5.57428e-05
Microsporidia	1.74427e-06	9.81234e-07	3.50354e-06	1.93113e-06	3.05277e-06	6.051e-06	2.15306e-06	3.66233e-05	1.69735e-06	3.15273e-06	3.28482e-06	1.45258e-06
Mollusca	0.000315789	0.000280563	7.26682e-05	8.07051e-05	8.60256e-05	2.84459e-05	1.81216e-05	2.15951e-05	3.09294e-05	2.10182e-05	2.187e-05	2.66912e-05
Nanoarchaeota	0	0	0	8.04637e-08	3.13105e-07	0	0	0	0	8.75757e-08	1.72885e-07	8.17078e-07
Nematoda	6.18078e-05	1.91341e-05	7.26078e-05	9.57518e-05	3.71029e-05	5.77652e-05	2.171e-05	2.36789e-05	1.25101e-05	3.0126e-05	1.59055e-05	2.2515e-05
Neocallimastigomycota	0	0	1.20812e-07	1.60927e-07	0	0	0	0	0	0	8.64427e-08	0
Nitrospinae	0.000161004	0.000264162	0.000559721	0.000190055	0.000386998	9.48822e-05	0.000251639	4.60948e-05	0.00023436	0.000291715	0.000274369	0.000279985
Nitrospirae	0.00338328	0.00700083	0.00471244	0.00377302	0.0185529	0.00184312	0.0138371	0.00244902	0.0136611	0.00915753	0.0276044	0.0197516
Onychophora	0	0	0	2.41391e-07	0	0	0	0	0	0	0	0
Orthonectida	0	0	9.06088e-07	1.60927e-07	0	0	0	0	0	0	0	0
Phaeophyceae	8.49383e-06	1.24056e-05	4.63313e-05	4.73931e-05	0.000150917	8.92054e-06	1.56994e-05	7.28046e-05	7.22944e-06	1.72524e-05	8.99004e-06	5.53797e-06
Placozoa	1.36508e-06	1.33167e-06	4.59084e-06	3.13808e-06	4.85313e-06	8.10959e-07	4.75468e-06	1.0103e-06	1.44589e-06	2.36454e-06	1.98818e-06	4.53932e-07
Planctomycetes	0.0211926	0.0219059	0.0129136	0.0212393	0.0189046	0.00811208	0.00883365	0.00473564	0.00864849	0.0104396	0.00989587	0.0117552
Platyhelminthes	2.25997e-05	1.47185e-06	5.1345e-06	3.62087e-06	6.34037e-06	5.73909e-06	7.17687e-07	6.63008e-06	3.33183e-06	1.33115e-05	1.14969e-05	2.08809e-06
Porifera	7.21976e-05	5.34072e-05	8.1125e-05	3.86226e-05	4.88444e-05	2.0274e-05	9.24022e-06	1.85642e-05	1.01841e-05	1.05091e-05	7.95273e-06	1.09852e-05
Priapulida	0.000169346	0.000208232	5.90165e-05	3.7657e-05	9.34618e-05	1.77163e-05	4.1267e-06	1.76802e-06	2.89178e-06	1.31364e-06	3.19838e-06	4.72089e-06
Proteobacteria	0.359674	0.446306	0.63471	0.430619	0.395402	0.351081	0.250013	0.204958	0.136165	0.226334	0.210257	0.197645
Rotifera	1.51676e-07	1.26159e-06	1.81218e-07	2.09206e-06	1.72208e-06	2.80716e-06	4.48554e-07	5.68292e-07	1.44589e-06	5.25454e-07	0	1.18022e-06
Spirochaetes	0.000972013	0.000878064	0.00374945	0.00403638	0.0106763	0.00111975	0.000876296	0.000329925	0.00112968	0.00101894	0.00106817	0.00112039
Streptophyta	0.00030191	0.000221479	0.000221267	0.000177503	0.00023068	0.000434799	0.000278462	0.000589888	0.000156659	0.000311419	0.000769945	0.000223244
Synergistetes	0.000170635	0.000106184	0.000255758	0.000467494	0.000805619	0.000117839	0.000420206	0.000114037	0.000485127	0.000382881	0.000398241	0.000392742
Tenericutes	1.82769e-05	1.38775e-05	0.000138511	0.0010865	0.000443043	6.73719e-06	1.01373e-05	3.85176e-06	1.7665e-05	1.2173e-05	7.95273e-06	1.12575e-05
Thaumarchaeota	0.00225003	0.00213257	0.000291821	0.000760865	0.000339797	0.000229688	0.000488745	0.00013658	0.000639649	0.00398172	0.00143443	0.00552308
Thermodesulfobacteria	0.000104429	8.28442e-05	0.000218609	0.000244449	0.000545585	0.000187955	0.000227238	6.57325e-05	0.0002607	0.000309493	0.00025224	0.000251751
Thermotogae	0.000136887	0.000136251	0.000306318	0.00060219	0.00131394	0.000246095	0.000239618	6.8132e-05	0.000191297	0.00031247	0.000214119	0.000217161
unclassified_d__Archaea	0.000159032	0.000145503	0.000215528	0.000327004	0.000586211	0.000219333	0.000213153	8.47387e-05	0.000394728	0.000276214	0.000268145	0.000329555
unclassified_d__Bacteria	0.00945728	0.00834596	0.0190933	0.024816	0.038044	0.0153778	0.0220599	0.00877627	0.0258049	0.0265681	0.0224698	0.0247813
unclassified_d__Eukaryota	0.000549521	0.000563018	0.000563345	0.000388961	0.000611807	0.000559686	0.000236119	0.000245376	0.000254979	0.00035836	0.000232012	0.000219068
unclassified_d__unclassified	0.000917106	0.000724011	0.000785216	0.000540555	0.00124702	0.000428249	0.00129148	0.000319696	0.00126232	0.00172691	0.00148509	0.00141554
unclassified_d__Viruses	9.09295e-05	7.92697e-05	0.0112014	0.000532187	0.000249858	0.000394313	0.00017377	0.000273096	0.000111711	0.000236104	0.000131306	0.000133274
unclassified_k__Fungi	2.87425e-05	1.64006e-05	1.95715e-05	2.87255e-05	3.17801e-05	4.14213e-05	4.57525e-05	3.35293e-05	1.4396e-05	4.58021e-05	3.86399e-05	2.60557e-05
Verrucomicrobia	0.0134547	0.00662697	0.0101894	0.0147476	0.0105461	0.0278325	0.017712	0.013414	0.0159949	0.0311106	0.0135774	0.019667
Xanthophyceae	0	7.00882e-08	7.2487e-07	3.21855e-07	1.87863e-06	6.86196e-07	2.87972e-05	0.000271076	2.76605e-06	6.96227e-05	2.67972e-06	2.36045e-06
